# Supplementary material
Source: publisher site journal article supplement (https://arthropod-systematics.arphahub.com/article/63975/download/suppl/31/)
Supplement: Supplementary file 1

## Sheet: Hárok1
Table S1. List of hosts of Myrsidea quadrifasciata their geographic distribution, body size (cm) and body mass (g) with data about louse female temple width (TW), total length (TL) and total number of tergal setae.
Myrsidea quadrifasciata	host family	host species	location	Previously referred as	References	Size of Bird (cm)	Mean Size (cm)	log Size	Weight of Bird (g)	Mean Weight (g)	log Weight	TW Female of Louse (mm)	Mean TW F (um)	log TW	TL Female of Louse (mm)	Mean TL F (um)	log TL	Mean SUM Tergal setae F	log Tergal setae
Myrsidea quadrifasciata anoxanthi	Thraupidae	Loxipasser anoxanthus (Gosse, 1847)	Jamaica	M. anoxanthi	Price & Dalgleish (2007)	10.2–11.5	10.85	1.03543	10.5–12.5	11.5	1.0607	0.34–0.37	355	2.55023	1.26–1.34	1300	3.11394	63.5	1.80277
Myrsidea quadrifasciata anoxanthi	Thraupidae	Sporophila minuta (Linnaeus, 1758)	Venezuela	M. anoxanthi	Price & Dalgleish (2007)	8.6–9.6	9.1	0.959041	7–9	8	0.90309	0.34–0.37	355	2.55023	1.26–1.34	1300	3.11394	63.5	1.80277
Myrsidea quadrifasciata anoxanthi	Thraupidae	Sporophila nigricollis (Vieillot, 1823)	Peru	–	Present study	8.5–10.3	9.4	0.973128	8.5–11.2	9.85	0.993436	only male	–	–	only male	–	–	–	–
Myrsidea quadrifasciata argentina	Fringillidae	Spinus barbatus (Molina, 1782)	Chile	M. serini	Cicchino & Valim (2015)	12–13	12.5	1.09691	13–19.8	16.4	1.21484	0.38–0.40	390	2.59106	1.42–1.56	1490	3.17319	65.5	1.81624
Myrsidea quadrifasciata argentina	Fringillidae	Spinus magellanicus (Vieillot, 1805)	Peru	–	Present study	10–12	11	1.04139	11–15.5	13.25	1.12222	0.39–0.40	395	2.5966	1.43–1.48	1455	3.16286	67.5	1.8293
Myrsidea quadrifasciata argentina	Icteridae	Agelaioides badius badius (Vieillot, 1819)	Argentina, Paraguay	M. serini	Cicchino & Valim (2015), Kolencik et al. (2016)	18.6♂; 18.4♀	18.5	1.26717	46.6♂; 43,7♀	45.15	1.65466	0.44–0.46	450	2.65321	1.60–1.71	1655	3.2188	77	1.88649
Myrsidea quadrifasciata argentina	Icteridae	Agelasticus thilius petersii (Laubmann, 1934)	Argentina	M. serini	Cicchino & Valim (2015)	17.9	17.9	1.25285	33.5♂; 28.8♀	31.15	1.49346	0.46	460	2.66276	1.70–1.80	1750	3.24304	116	2.06446
Myrsidea quadrifasciata argentina	Thraupidae	Microspingus melanoleucus (d'Orbigny & Lafresnaye, 1837)	Paraguay	–	Present study	13	13	1.11394	9–15	12	1.07918	0.39	390	2.59106	1.38	1380	3.13988	96	1.98227
Myrsidea quadrifasciata darwini	Thraupidae	Camarhynchus psittacula Gould, 1837	Galápagos Islands	M. darwini	Palma & Price (2010)	13	13	1.11394	15–21	18	1.25527	0.38–0.40	390	2.59106	1.40–1.48	1440	3.15836	55	1.74036
Myrsidea quadrifasciata darwini	Thraupidae	Geospiza fuliginosa Gould, 1837	Galápagos Islands	M. darwini	Palma & Price (2010)	10–10.5	10.25	1.01072	12–17	14.5	1.16137	0.38–0.40	390	2.59106	1.40–1.48	1440	3.15836	55	1.74036
Myrsidea quadrifasciata darwini	Thraupidae	Geospiza magnirostris Gould, 1837	Galápagos Islands	M. darwini	Palma & Price (2010)	15–16	15.5	1.19033	27–39	33	1.51851	0.38–0.40	390	2.59106	1.40–1.48	1440	3.15836	55	1.74036
Myrsidea quadrifasciata quadrifasciata	Emberizidae	Plectrophenax nivalis (Linnaeus, 1758)	no location data	M. major	Price & Dalgleish (2007)	14–18	16	1.20412	18–56	37	1.5682	0.42–0.43	425	2.62839	1.60–1.66	1630	3.21219	70.5	1.84819
Myrsidea quadrifasciata quadrifasciata	Passeridae	Passer domesticus (Linnaeus, 1758)	Netherland?; Bulgaria, Czech Republic, England, France, Germany, Hungary, Italy, Sweden, Azerbaijan, India, Pakistan, USA-Mississippi, Hawaii	M. quadrifasciata, Myrsidea sp.	Piaget (1880); Séguy (1944), Alicata et al. (1948), Thompson (1957),Touleshkov (1974), Machacek (1977), Lakshminarayana (1979), Gadzhiev & Mustafaeva (1981), Mey (2004), Manilla (2005), Saxena et al. (2007), www.fauna-eu.org, present study	16–18	17	1.23045	20–39	29.5	1.46982	0.39–0.40	395	2.5966	1.36–1.40	1380	3.13988	75	1.87506
Myrsidea quadrifasciata quadrifasciata	Passeridae	Passer montanus (Linnaeus, 1758)	Bulgaria, Czech Republic, Hungary, Slovakia, Romania, Thailand, W. Java	M. balati, M. quadrifasciata, Myrsidea sp.	Touleshkov (1962), Macháček (1977), McClure & Ratanaworabhan (1973), Boonkong & Meckvichai (1987), Adam (2007), Adam et al. (2009), present study	14–15	14.5	1.16137	17–30	23.5	1.37107	0.38–0.41	395	2.5966	1.32–1.59	1455	3.16286	78	1.89209
Myrsidea quadrifasciata queleae	Passeridae	Passer luteus (Lichtenstein, M.H.C., 1823) - captive birds	Senegal	–	Present study	12–13	12.5	1.09691	11–16	13.5	1.13033	0.40–0.41	405	2.60746	1.52–1.65	1590	3.2014	96.5	1.98453
Myrsidea quadrifasciata queleae	Ploceidae	Quelea cardinalis (Hartlaub, 1880)	Botswana	M. queleae	Tendeiro (1964)	11	11	1.04139	11–15	13	1.11394	0.40–0.42	410	2.61278	1.63–1.64	1635	3.21352	104	2.01703
Myrsidea quadrifasciata queleae	Ploceidae	Quelea quelea aethiopica (Sundevall, 1850)	Kenya, Sudan,	M. queleae	Klockenhoff (1984b)	12	12	1.07918	15–26	20.5	1.31175	0.40–0.42	410	2.61278	1.63–1.64	1635	3.21352	104	2.01703
Myrsidea quadrifasciata queleae	Ploceidae	Quelea quelea lathami (Smith, A, 1836)	South Africa, Congo, Zambia	M. queleae	Tendeiro (1964), Klockenhoff (1984), Halajian et al. (2014)	12	12	1.07918	15–26	20.5	1.31175	0.40–0.42	410	2.61278	1.63–1.64	1635	3.21352	104	2.01703
Myrsidea quadrifasciata queleae	Ploceidae	Quelea quelea quelea (Linnaeus, 1758)	Senegal, Cameroon	M. queleae	Sychra et al. (2010), present study	12	12	1.07918	15–26	20.5	1.31175	0.39	390	2.59106	1.63–1.68	1660	3.22011	92	1.96379
Myrsidea quadrifasciata serini	Emberizidae	Emberiza citrinella caliginosa Clancey, 1940	New Zealand	M. serini	Klockenhoff (1984a), Price & Dalgleish (2007)	16–16.5	16.25	1.21085	20–36.5	28.25	1.45102	0.40–0.42	410	2.61278	1.45–1.56	1500	3.17609	80	1.90309
Myrsidea quadrifasciata serini	Fringillidae	Carduelis carduelis britannica (Hartert, 1903)	New Zealand	M. serini	Klockenhoff (1984a)	10.5–13.5	12	1.07918	9.5–24	16.75	1.22401	0.36–0.43	395	2.5966	1.41–1.65	1530	3.18469	81	1.90849
Myrsidea quadrifasciata serini	Fringillidae	Carduelis carduelis parva Tschusi, 1901	Spain	M. serini	Klockenhoff (1984a)	10.5–13.5	12	1.07918	9.5–24	16.75	1.22401	0.36–0.43	395	2.5966	1.41–1.65	1530	3.18469	81	1.90849
Myrsidea quadrifasciata serini	Fringillidae	Chloris chloris chloris (Linnaeus, 1758)	New Zealand	M. serini	Klockenhoff (1984a)	14.5–16	15.25	1.18327	17–34	25.5	1.40654	0.36–0.43	395	2.5966	1.41–1.65	1530	3.18469	81	1.90849
Myrsidea quadrifasciata serini	Fringillidae	Serinus canaria (Linnaeus, 1758) – domesticated form	England, New Zealand, Netherlands, Czech Republic	M. serini	Klockenhoff (1984a), RMNH.INS.UT, present study	12.5–13.5	13	1.11394	15–20	17.5	1.24304	0.36–0.43	395	2.5966	1.41–1.65	1530	3.18469	81	1.90849
Myrsidea quadrifasciata serini	Fringillidae	Serinus serinus (Linnaeus, 1766)	France, Morocco, Romania	M. serini	Séguy (1944), Klockenhoff (1984a), Negru (1963, 1965)	11–12	11.5	1.0607	8.5–14	11.25	1.05115	0.36–0.43	395	2.5966	1.41–1.65	1530	3.18469	81	1.90849
Myrsidea quadrifasciata textoris	Ploceidae	Euplectes franciscanus (Isert, 1789)	Senegal	–	Present study	11	11	1.04139	12–22	17	1.23045	0.37–0.38	375	2.57403	1.44–1.53	1485	3.17173	83	1.91908
Myrsidea quadrifasciata textoris	Ploceidae	Euplectes jacksoni (Sharpe, 1891)	Kenya	–	Present study	14	14	1.14613	40–49♂; 29–42♀	40	1.60206	0.41–0.42	415	2.61805	1.48–1.55	1520	3.18184	83.5	1.92169
Myrsidea quadrifasciata textoris	Ploceidae	Euplectes orix (Linnaeus, 1758)	South Africa	Myrsidea sp.	Lindholm et al. (1998), present study	13	13	1.11394	21–30♂; 17–26♀	23.5	1.37107	0.40–0.41	405	2.60746	1.54–1.63	1585	3.20003	86.5	1.93702
Myrsidea quadrifasciata textoris	Ploceidae	Euplectes progne delamerei (Shelley, 1903)	Kenya	–	Present study	19–21♂; 15♀	17.5	1.24304	33–46♂; 25–39♀	35.75	1.55328	0.40–0.41	405	2.60746	1.43–1.88	1705	3.23172	87.5	1.94201
Myrsidea quadrifasciata textoris	Ploceidae	Foudia madagascariensis (Linnaeus, 1766)	Madagascar	–	Present study	13	13	1.11394	13–20	16.5	1.21748	0.38	380	2.57978	1.39–1.48	1435	3.15685	78	1.89209
Myrsidea quadrifasciata textoris	Ploceidae	Ploceus capensis (Linnaeus, 1766)	South Africa, Mozambique	M. textoris	Klockenhoff (1984b)	18	18	1.25527	44–52♂; 36–45♀	44.25	1.64591	0.40–0.44	420	2.62325	1.50–1.68	1590	3.2014	84	1.92428
Myrsidea quadrifasciata textoris	Ploceidae	Ploceus cucullatus cucullatus (Müller, 1776)	Ghana,	M. textoris	Klockenhoff (1984b)	17	17	1.23045	33–46, 26–37	35.5	1.55023	0.40–0.44	420	2.62325	1.50–1.68	1590	3.2014	84	1.92428
Myrsidea quadrifasciata textoris	Ploceidae	Ploceus cucullatus nigriceps (Layard, 1867)	South Africa	M. textoris	Klockenhoff (1984b)	17	17	1.23045	33–47♂; 26–37♀	35.75	1.55328	0.40–0.44	420	2.62325	1.50–1.68	1590	3.2014	84	1.92428
Myrsidea quadrifasciata textoris	Ploceidae	Ploceus cucullatus spilonotus Vigors, 1831	South Africa	M. textoris	Klockenhoff (1984b)	17	17	1.23045	33–46♂; 29–40♀	37	1.5682	0.40–0.44	420	2.62325	1.50–1.68	1590	3.2014	84	1.92428
Myrsidea quadrifasciata textoris	Ploceidae	Ploceus intermedius cabanisii (Peters, W, 1868)	South Africa	Myrsidea sp., M. textoris	Linholm et al. (1998), Sychra et al. (2014)	13	13	1.11394	17–27	22	1.34242	not mentioned	–	–	not mentioned	–	–	–	–
Myrsidea quadrifasciata textoris	Ploceidae	Ploceus nigricollis brachypterus Swainson, 1837	Cameroon	–	Present study	15–17	16	1.20412	21–30	25.5	1.40654	0.39	390	2.59106	1.44	1440	3.15836	82	1.91381
Myrsidea quadrifasciata textoris	Ploceidae	Ploceus philippinus (Linnaeus, 1766)	India, Thailand	–	Present study	15	15	1.17609	18–28	23	1.36173	0.38–0.42	400	2.60206	1.20–1.61	1490	3.17319	86	1.9345
Myrsidea quadrifasciata textoris	Ploceidae	Ploceus velatus tahatali Smith, 1836	South Africa	M. textoris	Halajian et al. 2012	13	13	1.11394	28–30♂; 25–34♀	29.25	1.46613	not mentioned	–	–	not mentioned	–	–	–	–
Myrsidea quadrifasciata textoris	Ploceidae	Ploceus velatus velatus (Vieillot, 1819)	South Africa	M. textoris	Klockenhoff (1984b)	13	13	1.11394	28–30♂; 25–34♀	29.25	1.46613	0.40–0.44	420	2.62325	1.50–1.68	1590	3.2014	84	1.92428
Myrsidea quadrifasciata viduae	Viduidae	Vidua macroura (Pallas, 1764)	Sao Tomé e Príncipe, Cameroon	M. viduae, Myrsidea sp.	Tendeiro (1993), Balakrishnan & Sorenson (2006)	11–12	11.5	1.0607	12.2–18.8	15.5	1.19033	0.34–0.37	355	2.55023	1.27–1.30	1285	3.1089	57	1.75587
